# Supplementary material for: Anticancer loading and controlled release of novel water-compatible magnetic nanomaterials as drug delivery agents, coupled to a computational modeling approach
Source: Royal Society of Chemistry journal article supplement (doi:10.1039/c3tb20502a), 2013-01-01
Supplement: c3tb20502a.pdf [file c3tb20502a.pdf]

## Supporting information

# Anticancer loading and controlled release on novel water-compatible magnetic nanomaterials as drug delivery agent, coupled to computational modeling approach

**Pierre Dramou,<sup>a, d</sup> Pengli Zuo,<sup>a, d</sup> Hua He,<sup>a, \*</sup> Lien Ai Pham-Huy,<sup>b</sup> Wenyue Zou,<sup>a</sup> Deli  
Xiao,<sup>a</sup> Chuong Pham-Huy<sup>c</sup> and Theophilus Ndorbor<sup>a</sup>**

<sup>a</sup> Department of Analytical Chemistry, Key Laboratory of Drug Quality Control and Pharmacovigilance China  
Pharmaceutical University, Ministry of Education, Nanjing 210009, Jiangsu Province China

<sup>b</sup> Department of Pharmacy, Stanford University Medical Center, Palo Alto, CA, USA

<sup>c</sup> Faculty of Pharmacy, University of Paris V, 4 Avenue de l'Observatoire, 75006 Paris, France,

<sup>d</sup>These Authors Contributed Equally to this Work.

\* Corresponding author. **Tel.:** +86 025 83271505; **Fax:** +86 025 83271505

**Email** [jcb315@163.com](mailto:jcb315@163.com), [dochehua@163.com](mailto:dochehua@163.com), (H. He)

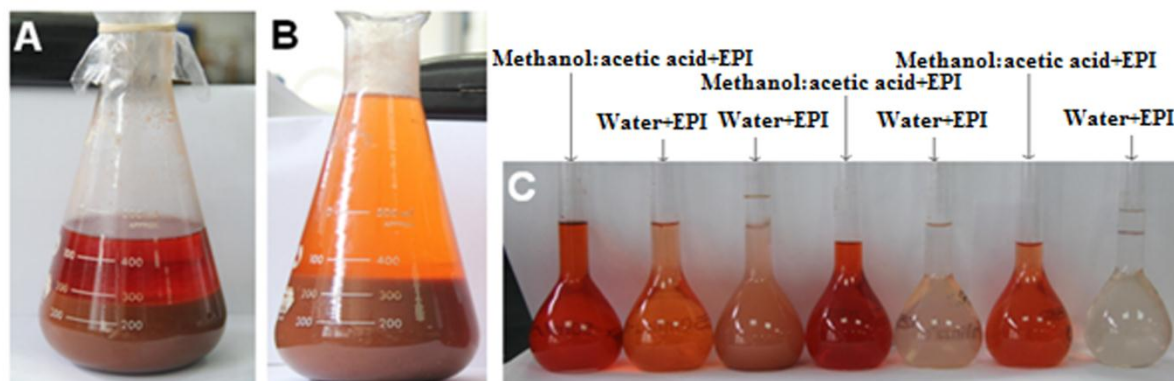

**Fig. S1** Photograph of the washing process just after finish to prepare the M-MIPs: (A) First supernatant solvent separated with the nanomaterials by precipitation couplet with the magnet; (B) Color of the separation stat after washing several times with water; (C) In order from left to right, samples of the washing supernatant interchanging methanol-acetic acid and water.

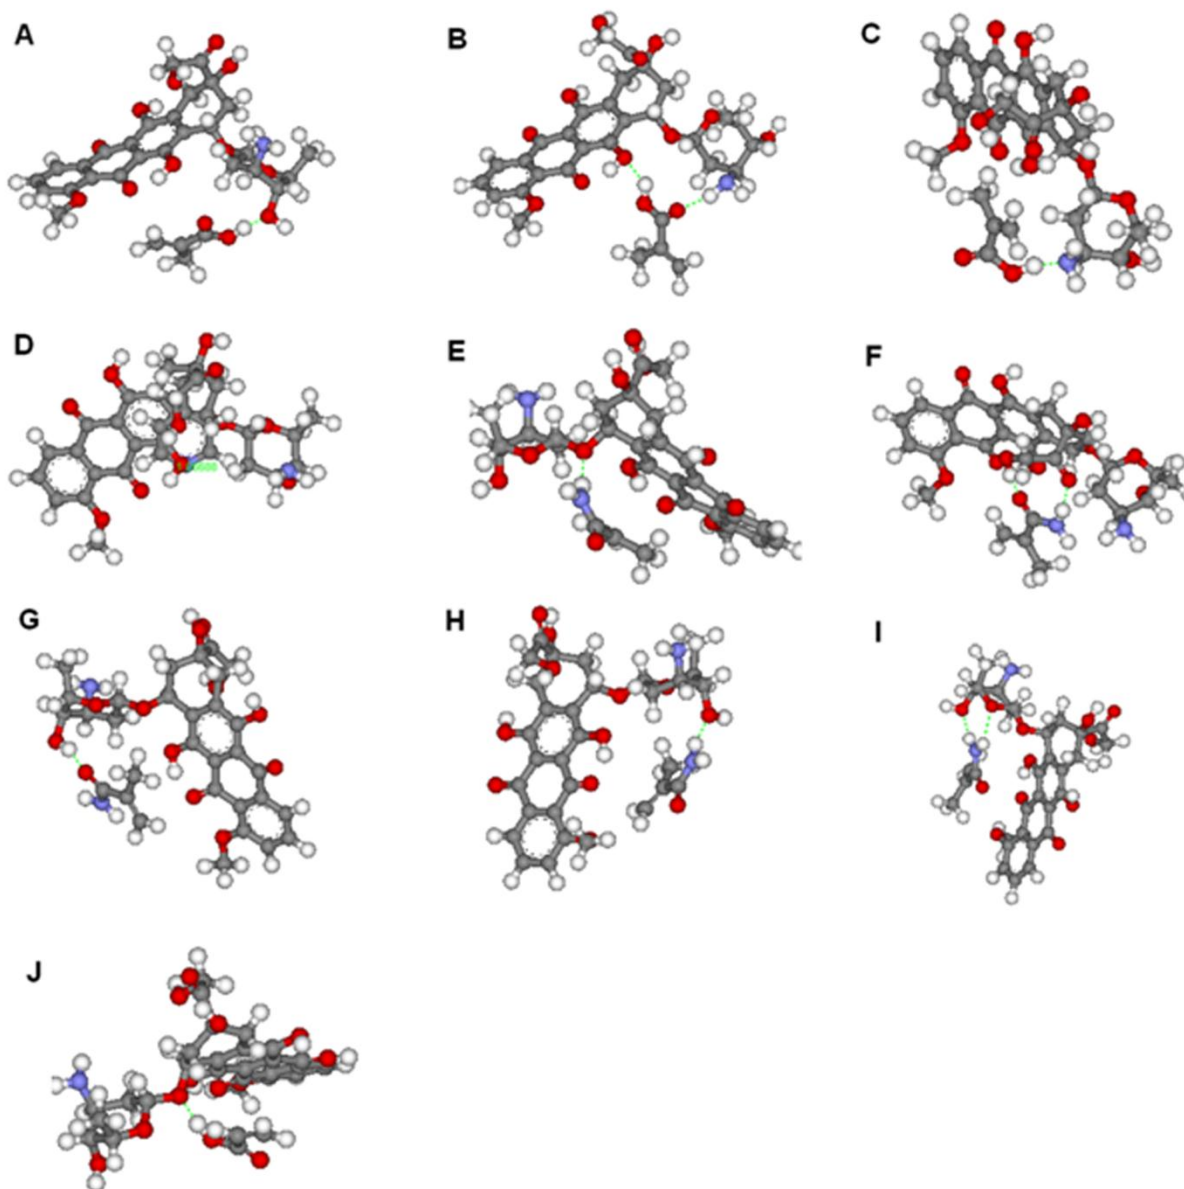

**Fig. S2** Additional chemical structures of interaction mode of Complex monomer-EPI: (A) EPI-MAA1, (B) EPI-MAA2, (C) EPI-MAA3, (D) EPI-4VP, (E) EPI-AA1, (F) EPI-AA2, (G) EPI-AA3, (H) EPI-AA4, (I) EPI-AA5, (J) EPI-MAM. Hydrogen bonds are represented by green dotted lines.
